# Supplementary material for: foxr1 is a novel maternal-effect gene in fish that is required for early embryonic success
Source: PubMed Central journal article supplement (PMC6109588; doi:10.7717/peerj.5534), 2018-08-23
Supplement: peerj-06-5534-s001.pdf [file peerj-06-5534-s001.pdf]

**Supplemental Data 1. List of foxR1 -related protein sequences used in the phylogenetic analysis.**

| Species common name | Species latin name  | Database     | Sequence ID     | Annotation   |                                                                                                                                                                                                                                                                                                                                                                                                                                                                                                                                                             |
|---------------------|---------------------|--------------|-----------------|--------------|-------------------------------------------------------------------------------------------------------------------------------------------------------------------------------------------------------------------------------------------------------------------------------------------------------------------------------------------------------------------------------------------------------------------------------------------------------------------------------------------------------------------------------------------------------------|
| Human               | <i>Homo sapiens</i> | ENSEMBL v.91 | ENSG00000176302 | <i>foxr1</i> | MGNELFLAFTTSHLPLAEQKLARYKLRIKPKPLEKKPNPKDKGPDYEPNLWMVWNPNIYPPGKLEVSG<br>RRKREDLTSTLPSSQPPQKEEDASCSEAAGVESLSQSSSKRSPPRKRAFSPSTWELTEEEEAEDQEDSSSMAL<br>PSPHKRAPLQSRRLRQASSQAGRLWSRPLNYFHIALALRNSSPCGLNVQQIYSFTRKHFFPFRTAPEGWK<br>NTVRHNLCFRDSFEKVPVSMQGGASTRPRSLWKLTEEGHRRFAEEARALASTRLESIQQCMSQPDVMPFL<br>FDL                                                                                                                                                                                                                                                |
| Human               | <i>Homo sapiens</i> | ENSEMBL v.91 | ENSG00000189299 | <i>foxr2</i> | MDLKLKDCFWYSLHGQVPGLLDWDMRNELFLPCTTDQCSLAEQILAKYRVGVMKPEMPQKRRPSPDG<br>DGPPCEPNLWVWVDPNLCPLGSQEAAPKPSGKEDLTNISFPQPPQKDEGSNCSEDKVVESLPSSSSEQSPL<br>QKQGIHSPDFELTEEEAEEPDDNSLQSPKCYQSQKLWQINNQEKSQWRPPLNCSHLIALALRNPHCG<br>LSVQEIYNFTRQHFFPFWTAPDQGWKSTIHYNLCLFDSFEKVPDSLKDEDNARPRSLWKLTKEGHRRFWEET<br>RVLAFAQRERIQECMSQPELLTSLFDL                                                                                                                                                                                                                            |
| Human               | <i>Homo sapiens</i> | ENSEMBL v.91 | ENSG00000139445 | <i>foxN1</i> | MIESDTSSIMSGIIRNSGQNHHPSPQEYRLLATTSDDDLPGDLQSLSWLTAVDVPRLQQMASGRVDLGGPC<br>VPHHPGALAGVADLHVGATPSLLHGPAGMAPRGMPLGPITGHRDSMSQFPVGGQPSGLQDPPHLY<br>SPATQPQFPLPPGAQQCPPVGLYGPFGVRRPPYPQPHVAVHSSQELHPKHYPKPIYSYSLIAMALKNSKTG<br>SLPVSEIYSFMKEHFYFKTAPDQGWKNSVRHNLNLNCKFEKVENKMGSSSRKGLWALNLARIDKMEEMH<br>KWKRKDLAAIHRSMANPEELDKLISDRPESCRPPGKPEPEAPVLTHATTAVAVAHGCLAVSQQPLPMTLS<br>LQSVPLHHQVQPQAHLAPDSPAQAQTPPLHALPDLSPSPLPHPAMGRAPVDFINISTDMNTEVDALDPSIM<br>DFALQGNLWEEMKDEGFSLDTLGAFAADSLGCDLGASGLTPASGGSDQSFPLQVTLQVTLGYTAYSTPDSVAAS<br>GTSSSSQYLGAQGNKPIALL |
| Human               | <i>Homo sapiens</i> | ENSEMBL v.91 | ENSG00000053254 | <i>foxN3</i> | MGPVMPSSKPPSSGISVSSGLSQCYGGSGFSKALQEDDDLDLDFSLDIRLEEGAMEDEELTNLNLWLESKNL<br>LKSFGESVLRVSPVQDLDDTTPSPAHSMPYDARQNPNCPPYFSLIFMAIEDSPTKRLPVKDIYNWIL<br>EHFPYFANAPTGWKNSVRHNLNLNCKFKKVDKERSQSIGKGLWCIDPEYRQNLQALKKTPYHPHPHFVNT<br>PPTCPQAYQSTSGPPIWPGSTFFKRNQALLQDPDIDAASAMLLNTPPEIQAGFPFPGVIQNGARVLSRGLFP<br>GVRPLPITIGVTAAMRNGITSCRMRTESEPCGSPVSGDPKEDHNYSSAKSSNARSTSPDSISSSSSSAD<br>DHYEFATKGSQEGSEGSEGSFRSHESPSDTEEDRKHKSQKEPKDSLGDGSGYASQHKRQHFQAKARKVPSDTL<br>PLKKRRTKPPESDDEEMKEAAGSLLHLGIRSLNITNRTAKGQKEQKETTNN                                          |

|            |                         |              |                    |              |                                                                                                                                                                                                                                                                                                                     |
|------------|-------------------------|--------------|--------------------|--------------|---------------------------------------------------------------------------------------------------------------------------------------------------------------------------------------------------------------------------------------------------------------------------------------------------------------------|
| Mouse      | <i>Mus musculus</i>     | ENSEMBL v.91 | ENSMUSG00000074397 | <i>foxr1</i> | MGNESFLAFTTAHLPLAEQNLARYKLRVVDPPKLPLEKKNSEDDGPEFEPNLWMWVNPVVPKLEVP<br>PESSKREDVASTLPSPQPPQEEEDANGSEATGVESLPLSSSEQSPSQKHFASSPSTLELETEEEAEDQDDGSSV<br>ALPSPHKRAPLQNRRLRQANNQAGRLWSRPLNYFHIALALRNSSPCGLNVQQIYSFTRHHFFPRTAPEG<br>WKNTVRHNLCFRDSFEKVPVSAQGGANTRPRSCWLKLTTEEGHRRFEEEARALASTRLQSIQQCMSQPDM<br>PFLFDL       |
| Mouse      | <i>Mus musculus</i>     | ENSEMBL v.91 | ENSMUSG00000071665 | <i>foxr2</i> | MDVKVKNRDFWYSLHGQVPGMLDWDMGNEFFLPCTMDQCSFAEQSLAKYKIQLTKPPALPQKKSNFD<br>DDGPPAEPGLWVWVNPVCPINSKEAPNTIHKILPSAFPQTGESDYLTQRMVQSLVLTHTHHQQKL<br>LIYSTAPDFIEEETKEQECTSSKKYSKHTVCHGPHREKESWPRPLNYSHLVALALKSSPSCGLNVQQIYNFTR<br>QHFPYFRTAPEGWKNTIRHNLCSLTCEKVPVDLEDEPDGKPRFLWKLTDEGNRFFQEDTRVLAYARRESIK<br>QSMRQPELIDLLFHL |
| Rat        | <i>Ratus norvegicus</i> | ENSEMBL v.91 | ENSRNOG00000029089 | <i>foxr1</i> | MGNECFLSFTTSHLSEAEQKLALYLRIVPEPKLPLEKIPNDKDGPDIKPNLWVWVNPVVPKLEVAVK<br>KEDSSAPPASQSALKEEDSCSEASEIPAQQPPPRKQKRQRNTLPLPLASGRRAPLQNRWLRQAISPEG<br>RLWSRPLHYFHIALALRNSSPCGLSVQQIYNFTREHFPPRTAPEAWKNTVRHNLCFRDSFEKVPVSKQGE<br>ASTRPRSCWLKLTTEEGHRRFSEARTLASTRLQSIQQCMSQPGVKP                                             |
| Rat        | <i>Ratus norvegicus</i> | ENSEMBL v.91 | ENSRNOG00000030619 | <i>foxr2</i> | MNVKVKNRDFWYSLHGQVPGMLDWDMGNEFFLPCTMDQCSFAEQSLAKYKIQLTKPPTLPQEKSSFDN<br>DGPPTEPSLWVWVNPVCPVNSKEPPNPIHKVLPAAFPQTGESECFGTQRVASLSVIHTEYHQKLP<br>IYSTVPHFMEETKEQECASSKKYSKYTMHYGPHREREAWPRPLNYSHLVALALKSSPSCGLNVQQIYNFT<br>RQHFPYFRTAPEGWKNTIRHNLCSLTCEKVPADLEDEPDGKPRFLWKLTTEGNRFFQEDTRVLAYARRESI<br>KSMRQPELIDLLFHL   |
| Guinea_Pig | <i>Cavia porcellus</i>  | ENSEMBL v.91 | ENSCPOG00000001855 | <i>foxr1</i> | MILHCFLYFLTFIYFFLYKLRIVDPPVLPLEKKNSDGDPDIEPNLWVWVNPVVPKLEVSDPTSVADE<br>TSEVPCQPPEKQDHSPPRQKRKQSFWSWAPLPFTRCTLEWRLQPTISPEGRWSRPLNYFHIALALS<br>NPPCGLNVQQIYSFTRYVPGFPHLGLRMSTLPGQCVNRVPTGTHRCT                                                                                                                        |
| Pig        | <i>Sus scrofa</i>       | ENSEMBL v.91 | ENSSSCG00000015101 | <i>foxr1</i> | MGNESFLAFTTTHLPLAEQNLARYKLRIVEPKLPGLGKKNPNPNNDGPDFEPNLWMWVDPNIVLPPGKLEVP<br>QPSKGENLTSTVPSQLSPKEEDFARYAEATVVESSPSPSREQSPPRKRFASSPSTWELTEEEEAENQDDSSV<br>ALPSPHKRAPLQSRRLRQTNQAGRLWSRPLNYFHIALALRNSSPCGLNVQQIYSFTRQHFFPRTAPEG<br>WKNTVRHNLCFRDCFEKVPVSMQGGAPTRPRSCWLKLTTEEGHRRFVEEVRALASTRLESIQCMSQPDM<br>PFLFDL     |

|       |                               |              |                    |              |                                                                                                                                                                                                                                                                                                                                        |
|-------|-------------------------------|--------------|--------------------|--------------|----------------------------------------------------------------------------------------------------------------------------------------------------------------------------------------------------------------------------------------------------------------------------------------------------------------------------------------|
| Pig   | <i>Sus scrofa</i>             | ENSEMBL v.91 | ENSSSCG00000020805 | <i>foxr2</i> | MDLKLKPNDFWYSLHGQVPGLLDWDMDGNEFFLPCTTDQCPLAEQNLAKYRLRVMESPKVPQEKRPSPGK<br>DGNSEPNLWMMVNPVCPFGSQEASKPSKRKNVASIFPSPQLLPKDEESNCSEAIMESLPSSSGKQSP<br>QKRLTSSPSDWELTEETEGEQDNNSSVALKSPNKECFHSQKLWQGDSQERKSWPRPPLNYSHLIALALRNSP<br>PCGLNVQEIYSFTQQHFPFFWTAPDGWKNTRHNLCLFLGSFEKVPVSLPDGANAKPRSGLWRLTEEGHRRF<br>QEETRALASARRESIQCMSQPDVMTSLFGL |
| Horse | <i>Equus caballus</i>         | ENSEMBL v.91 | ENSECAG00000016285 | <i>foxr1</i> | MGNECFLAFTTAHLPAEKNIARYRLRIIPQLKPLEKKPNPDKDGPDFEPNLWMMVNPVLPKLEVP<br>SKGEDLTNLPSPQSPRKEEDFANFSEATVVELPSSSEQSPAWKRFASSSSNWELTEEEAEQDSSSVA<br>LPSPHKRAPLQSRRLRQANSQEGRLWSRPLNYFHIALALRNSSPCGLNVQIYSFTRQHFPFFRTAPEGW<br>KNTVRHNLCFRDSFEKVPVSMQGGASTRPRSLWKLTEEGHRRFAEEARALASTRLESIQCMSQPDVMPF<br>LFDL                                     |
| Horse | <i>Equus caballus</i>         | ENSEMBL v.91 | ENSECAG00000026859 | <i>foxr2</i> | MDLKLKTPKFLYSLHGQVPGLLDWDMDANKILLCTTDQPVAEQDLTKYRLQVTEPRKVPQERRPSLNKDG<br>DVEANLWMSPNIVYLSGQEAARPSKKTDLTSMFPSPQLPKDKESNCSEATVMESLPSSSSESPKQFTSS<br>PSNWELTEEDTEEQDSSNMTLQPPNKGEFCFQSQKLWQGNSQERRSWPPLNYSHLIALVSRNSPPCDLRV<br>QEVISITQHFLFFWTAPNGWKNTRHNLCLFLGSFEKATVVSFDGANARPWVSLWRLTEKHHHFQEETRALAS<br>ARESIQMRQPGVMTSLFDL           |
| Cow   | <i>Bos taurus</i>             | ENSEMBL v.91 | ENSBTAG00000014606 | <i>foxr1</i> | VDLKLQHVDFWASLHGQVPGLLDWDMDGNEFLAFATSHLPLAEQNLARYKLRIVEPPMLPLEKKPNPDKD<br>GPDFEPNLWMMVDPNIMFPPGKLEVPESKGNLTTTAPSPQVPKEDFAKCEATEVELLSPPGDQCSP<br>WKRATSLSNWELTEEKEAEDQDDRSSVALPSSHKAPLQSRRLRQANSQEGRLWSRPLNYFHIALALRN<br>SAPCGLNVQIYSFTRQHFPFFRTAPEGWKNTVRHNLCFRDSFEKVPVSMQGGVSSRPRSLWKLTDGHR<br>RFAEEARALASTRLERIQCMSQPDVMSSFLDL       |
| Cow   | <i>Bos taurus</i>             | ENSEMBL v.91 | ENSBTAG00000046659 | <i>foxr2</i> | MDLKLKNEFWYSLHGQVPGLLDWDMDGNEFFLPCTTDQCPLAEQNLAKYRLQVMETPKVPQERGSSPGKD<br>RPNSEPNLWMMVNPNIACSLGQETPEPSKKDLAHILLSPQLLAKDEVNPNCEATVMQSLPSSSSKQSP<br>KQITFSDDRELTETEKEKDSNSSVALQSPNKGECFQSQNLWQGNSQERKSWPRPPLNYSHLIALALRNSP<br>PCGLNVQEIYSFTQQHFPFFWTAPYGWKNTRHNLCLFLDSFEKAPVSLQDGASARPRPGLWRLTEEGHRRF<br>QEETRALASARRESIQCMSHPDVMTSLFDL  |
| Panda | <i>Ailuropoda melanoleuca</i> | ENSEMBL v.91 | ENSAMEG00000000053 | <i>foxr1</i> | VDLKLQHLDLWASLHGQVPGLLDWDMDGNEFLAFTRCDPCSFLLHIIARYRLRIVEPPKVPVEKNPSPDN<br>DGPTVEPNLWMMVNPVFPFGKLEVPKRGEDQPSTLPSQPPEEDLADCSSEATAGESESLPSSSEQ<br>SPPRKRMRFASSPSTWELAEAEADQDSSVALPSPHKRAPLQSRPRQASSQEGRLWSRPLNYFHIAL<br>ALRNSSPCGLNVQIYNFTRQHFPFFRTAPEGWKNTVRHNLCFRDSFEKVPVSMQAGASVRPRSLWKLTK<br>EGHRRFAEEARALASTHLESIQCMSQPDVMPFLFDL     |

|              |                                   |              |                    |              |                                                                                                                                                                                                                                                                                                                                               |
|--------------|-----------------------------------|--------------|--------------------|--------------|-----------------------------------------------------------------------------------------------------------------------------------------------------------------------------------------------------------------------------------------------------------------------------------------------------------------------------------------------|
| Panda        | <i>Ailuropoda melanoleuca</i>     | ENSEMBL v.91 | ENSAMEG00000018997 | <i>foxr2</i> | MDIKLNPEFWYSLHGRVPGLLDWDMGNEFFLPCTTDQCHLAEQNLAKYRLRVMEPPKVPQESRSPDKD<br>GPDCEENLWMMWVNPIMCPLGSQETLKPSEKNLTRLMLPYQPPLPRDEESNCSKATVMESLPTSSNKKSSP<br>QQKQCTYSPSDWEITEEKTEEQDDNCSVLSQSPNKGEFCFQNKQLWQGNSEQERRSWPRPPLNYSHLIALALRN<br>SPPCGLNVQEIYNFTRQHFFFWTAPNGWKNTIRHNLCLFLGSFEKAPVNLQDGTNAKPRSGLWRLTEEGHR<br>CFQEKTRALASARRESIQQCMSQPDVMTALFGL |
| Opossum      | <i>Monodelphis domestica</i>      | ENSEMBL v.91 | ENSMODG00000013351 | <i>foxr1</i> | VSLSPHKMNPQLQREFWESLHGKVPGLLDWKMNEELKLATTTDQLPRGEMKCLNPPFISFRVKYKPPR<br>LSTQYVKQSPDKNHTALEPNLWMMVDLNVCPKPKRQTSKEPDSSQNPPSLKEENASCSSEDSVQLQPSIS<br>EQPQASTSEQLTDEEENTSTTLPTPHTKELRQGFRRHKSTQVGVWRWPRPLNYCHLIALALKNSPPGGLN<br>VQEIYNFTRKHFFFWTAPNGWKNTIRHNLCLFRGSFEKAPVSPDGETSRPRSRYRWRLTEEGHRRFSQEARAL<br>EAAQLHSIQKCMShPEMMSVLFDL             |
| Bald eagle   | <i>Haliaeetus leucocephalus</i>   | NCBI         | XP_010573382.1     | <i>foxr1</i> | MYLSFQNKSFWESLHLQNGLEDWMAEELKLTVAEEFLQAPDQTLRHHMLKWQADPSAHGCSLPGALP<br>DAREPGVQPHLWMMWVNPVSLVCPVPRTPGVDPARNSLTKALTTGGATEPSSPNTSCDYSDLDCEEDVLSSSSE<br>GGKLTEDDLHVDVVPVQEMPELTPMPMPWKSTVLRPQSVKLSPRQMSSTEIEGGWPRPLNYCIL<br>TLALCNSTSGSLTVQQIYQFMRQHFFFWTAPNGWKNTIRHNLCLFSSCFEKTTFMFCSEGNRKSCLWKLTP<br>GHRKFQEEAALPREALDLVCSMSEPDLMRTLFGL        |
| Penguin      | <i>Pygoscelis adeliae</i>         | NCBI         | XP_009321672.1     | <i>foxr1</i> | MYLSFQNKSFWESLHLKNGLEDWMAEELKLAITTEELLQALDEILRRRLTKWQADPLAHGCSLPGALPDAR<br>DKFGTWSVPGVGDGSDSPVASVAGATETSSPNTSWDYSDLDCEEDVLSSSSEAGKLTEDSRVDIPVLQ<br>EMPETPKLKAMLMRKSAVLRPQSVKLCPRQTSTKIEGRWPRPLNYCILITLALCNASGSLTVQQIYQFT<br>RQHFFFWTAPNGWKNTIRHNLCLFSSCFEKTTFVFCGEGNRKSCLWKLTPGRRKFQEEAALPKEALDLVR<br>QSMSEPELMRSLFGL                         |
| Crested ibis | <i>Nipponia nippon</i>            | NCBI         | XP_009467360.1     | <i>foxr1</i> | MYLSFQNKSFWESLHLKNGLEDWMAEELKLTVTTEFLQEPGLQPHLWMMWVNPVSLVCPVPGVPEPAG<br>SDSPVASVAGATETSSPNTSWDYSDPDCSEEDALSSSGEAGKLMEGEDASCVDIPVQETPETPELTKATLMP<br>RKSAVLRPQSVKLCPREMSAKIEGGWPRPLNYCILIALALCNASGSLTVQQIYQFTRQHFFFWTAPNGW<br>KNTIRHNLCLFSSCFEKTTFVFCGEGNRKSCLWKLTPGRRKFQEEAALPKEALDLVRQSMSEPDLMRSLFG<br>L                                     |
| swan goose   | <i>Anser cygnoides domesticus</i> | NCBI         | XP_013042577.1     | <i>foxr1</i> | MLETPLKAMPLPQKSEIHRSQSMKLNKTRQISTKIEGGWPRPLNYCILITLALCNSTNGSLTVQQIYQFTRQ<br>HFFFWTAPAGWKNTIQHNLCLFSSCFEKTTFVFCRNGNHKSQLWKLTPKQKQKHFPPVPEALDLVRIIRG<br>PS                                                                                                                                                                                      |

|                          |                                   |              |                    |              |                                                                                                                                                                                                                                                                                                                                                       |
|--------------------------|-----------------------------------|--------------|--------------------|--------------|-------------------------------------------------------------------------------------------------------------------------------------------------------------------------------------------------------------------------------------------------------------------------------------------------------------------------------------------------------|
| Chinese alligator        | <i>Alligator sinensis</i>         | NCBI         | XP_006037673.1     | <i>foxr1</i> | MATVDYKTVFSLNKNTFWESLHLKSGLEDWDMEEELKLTNTCDQLPQAADKEVNHMLKWQCDQQAC<br>KQSLPRERSDAPPDESINVQPHLWMWVNPVNCPTARHLGTDATEDRSLSSSTAADISFSSPSPSLDYSNLD<br>CSEEDLLSSASEAEKFTEDEDAASVDIQLSQKMOVETPKFKANLAPWKAKVSRSQSRKLYTLQAKAKTKEIWP<br>RPPLNYCILITLALYNSAEGSLTVQQIYQFTRHHFFPFQTAPDGWKNTIRHNLCSRSFEKTRFVCSSEGRKA<br>RLWKLTTDGRRKFEEMQALPTEALALVHQSMNEPELMSSLFCL |
| American alligator       | <i>Alligator mississippiensis</i> | NCBI         | XP_006266901       | <i>foxr1</i> | MATVDYKTVFSLNKSTFWESLHLKSGLEDWDMEEELKLTNTCDQLPQAADKEVNYHMLKWQCDQQACK<br>QSLPRERSDAPPDESINVQPHLWMWVNPVNCPTARHLGTDATEDRSLSSSTAADISFSSPSPSLYNSLDCS<br>EEDLLSSASEAGKFTEDEDAASVDIQLSQKMOVETPKFKANLAPWKAKVSRSRKLYTLQAKAKTKEIWP<br>PLNYCILITLALYNSAEGSLTVQQIYQFTRHHFFPFQTAPDGWKNTIRHNLCSRSFEKTRFVCSSEGRKARL<br>WKLTTDGRRKFEEMQALPTEALALVHQSMNEPELMSSLFCL     |
| Chinese softshell turtle | <i>Pelodiscus sinensis</i>        | ENSEMBL v.91 | ENSPSIG00000011857 | <i>foxr1</i> | MYLNFQNKMFWESLHLKSGLEDWDMEEELKLTNTDQFPQGSEAVRSVLMGVLHPTFSIGCCRPAARGKG<br>VKTQKSHLWMWVNPVNCPIGCPVDPAPSNEPFSVADAPGFSSPSSSLNYSNLDCSEEDLLSSSETTEKF<br>TEDEAASMMDSLQKMKKPKAAVTPQKPKMPSQSKLKYILQASTKIKGGWPRPLNYCILITVALRNS<br>AEGSMTVQQIYQFTRQHFFPFQTAPDGWKNTIRHNLCSRSFEKTMHFVFCNEGNRKSRWLKLTPEGCRKF<br>QEEVQTLSEALDLVSQSLSQPEQMRSFLSL                      |
| Python                   | <i>Python bivittatus</i>          | NCBI         | XP_007441556.1     | <i>foxr1</i> | MLPKEDSQSSPQACRNKVFRRSRKLRKRAQGGWPRPLNYCILISLALSSVDSLTVQEIYKFRHHFFPFR<br>TAPEGWKNTVRHNLCSRSFEKTTDFVCLGEGNRKSRWLKLTTEGRRKFQEEAQALPEDMMGLVHQSMDKP<br>ELMRSLFGL                                                                                                                                                                                          |
| Central bearded dragon   | <i>Pogona vitticeps</i>           | NCBI         | XP_020649591.1     | <i>foxr1</i> | MLGLPRWAVAPPSEASHAEGPGVESTMQPHLWTWVNPVLCPIPGVLFPPAGQEAPPAHLLCLQEEQL<br>CSSLASQAEERGGEAPQPVADLPQAEDAQRGQTPASRKAKTLRSRGRKRIQGGWARPPLNYCILISLALS<br>SSADGSLTVQEIYQFTRQHFFPFRTAPEGWKNTVRHNLCSRSFEKTTDFVCLGEGNRKSRWLKLTSEGRKFKQ<br>EEMQVLTTEVMGLVHQSMRPELMSSLFGL                                                                                           |
| Armadillo                | <i>Dasyus novemcinctus</i>        | ENSEMBL v.91 | ENSDNOG00000041022 | <i>foxr1</i> | LPESEPETLSRLHGQVPRLLDWDMGTSASCLLLPLAEQKLARYRLQRVEPPKRLPEKNRPDNDGPNIEPN<br>LWMWVNSNIMYPPEKLEATARPDKHTLLSVTPKEGDSNCSTSSWWWVSHCHLSPHPLPQATGRQHFFP<br>FQTAPEGWKNTIHQHLCHFHSFEKVPVTMQGGSSVRPPSLWVKVTEEGHQRFEEEAGAASTRLENIQQC<br>MSWPDMMPPFLFAL                                                                                                             |

|           |                                |              |                    |              |                                                                                                                                                                                                                                                                                                                                                                                                                                                                                                                                                                                                                                                                                                                                                                      |
|-----------|--------------------------------|--------------|--------------------|--------------|----------------------------------------------------------------------------------------------------------------------------------------------------------------------------------------------------------------------------------------------------------------------------------------------------------------------------------------------------------------------------------------------------------------------------------------------------------------------------------------------------------------------------------------------------------------------------------------------------------------------------------------------------------------------------------------------------------------------------------------------------------------------|
| Armadillo | <i>Dasybus novemcinctus</i>    | ENSEMBL v.91 | ENSDNOG00000019290 | <i>foxr2</i> | MDLKLKNEFWYSLHGQVPLLDWDMGNEFFLPHTTDQHPLAEQNLAKYQLQIMESPKLPLERRPNPKD<br>GPDYDNLWMWVNPVCSLSIQEAPNRNKEKDLTSVLPQLQPPSKDEEFTCLEATVVESLPSSESQYPLQK<br>RFTSFPDDELTEEAEEQDGNSSAALRSPDKGKCYQSQKLWQANSQERRSWPRPLNYSHLIALALRNSP<br>PCGLNVQEIYNFTRQHFPFFWTAPDGWKNTRHNLCLGSEKVPVSLQDRANARPRSLWRLTEEGHRRF<br>QEETRALASARRESIQQCMSRPDMTFLFDL                                                                                                                                                                                                                                                                                                                                                                                                                                        |
| Xenopus   | <i>Xenopus tropicalis</i>      | ENSEMBL v.91 | ENSXETG00000021565 | <i>foxr1</i> | MLLPNPLDVALRAPKPECTFRPSLWLVDPNLVPCPEWINRIPPELTSPPLQLRQLSNDYSTVEDESE<br>APTSCSDVLTDDDDSYNPWQPKHKKKAKCLGKLRVQKGLTQLESWPRPLNYCNLISLALRNSDGLNV<br>QQIYSFVREHFPFFRIAPDGWKNTRHNLCSFSSFEKSSGWVACDGHRRSCLWKLTRQGRKFRNEMHALS<br>DDLHLVLRKSMKKPALMELMFGM                                                                                                                                                                                                                                                                                                                                                                                                                                                                                                                       |
| Xenopus   | <i>Xenopus tropicalis</i>      | NCBI         | NP_001037918.1     | <i>foxr1</i> | MYLRFANRKPYEKLHLSTALEWDMSEELKLSITADQYFAGADDKVERYTLRRQHSTEVSPTRSEEGDYQEC<br>TFRPSLWLVDPNLVPCPEWINRIPPELTSPPLQLRQLSNDYSTVEDESEAPTSCSDVLTDDDDSYNP<br>WQPKHKKKAKCLGKLRVQKGLTQLESWPRPLNYCNLISLALRNSDGLNVQQIYSFVREHFPFFRIAPD<br>GWKNTRHNLCSFSSFEKSSGWVACDGHRRSCLWKLTRQGRKFRNEMHALSDDLHLVLRKSMKKPALM<br>ELMFGM                                                                                                                                                                                                                                                                                                                                                                                                                                                              |
| Xenopus   | <i>Xenopus laevis</i>          | NCBI         | AAI55352.1         | <i>foxr1</i> | MYLRFANRKPYEKLHLSTALEWDMSEELKLSITADQYFAGADDKVERYTLRRQHSTELSPTRSEEGDFQEC<br>KFRPSLWLVDPNLVPCPEWINRIPPELTSPPLQLRQLSVEYSTVEDESEAPTSCSDLMTDDDDNDSDY<br>NPCQPKNKHKRAKCLGKLRVQKGLTELESWARPPPLNYCNLISLALRNSDGLNVQQIYSFVRDHFPFFRIA<br>PDGWKNTRHNLCSFSSFEKSSGWVACDGHRRSCLWKLTRQGRKFRNEMHALSDDLHLVLRKSMKKPAL<br>MELMFGM                                                                                                                                                                                                                                                                                                                                                                                                                                                        |
| Fruitfly  | <i>Drosophila melanogaster</i> | ENSEMBL v.91 | FBgn0015396        | <i>jumu</i>  | MFELEDYSSGIHEGFFSKYADAAGPSLDFYVSDSMQEMLNVDIRAEIANVVGSSSDLTSSLDQTLAISAINN<br>NQSNGNSSQSASYNANANFLTSSGLHASPTAKWMGSSANFWSNSDYADLACVNPISVMPLINSTSAG<br>MFSPKKNTASSTQGRSGAVPSSPSAERDQHKSHLTFSPAQMKSAGSMRRDQVMAHIPKQISVVTGTGT<br>TAPATMATNSVLQRRNSSAVDAVRKDLVTELRKAQSSPVNSLEELGKGGSTLLNASVGTATNTIKLAPGIG<br>GLTFANSAAYQKQLKQTSLVKSPGGISPGAGSNMGLKREDSNKRGLQASTTPKSIASAANSPPHMQMSNYSL<br>GSPSSLSASSPLGNVSNLNIANNNTSGAGSGLVKPLQKVKLPPVGSPPFKPAYSYSLIALALKNRAG<br>SLPVSEIYFLCQHFPYFENAPSGWKNVSRHNLNLKCFEKIERPATNGNQKRCRWAMNPDINKMDEEV<br>QKWSRKDPAAIRGAMVYPQHLESLEGERGEMKHGSADSDVELDSQSEIESSDLEEHEFEDTMVDAMLVEEE<br>DEEEDGDDDEQIINDFDAEDERHANGNQANNLPINHPLLGQKSNDFDIEVGDLYDAIDIEDKESVRRISND<br>QHIIELNPADLNATDGYNQPALKRARVDINYAIGPAGELEQQYQKVKVQVQVIQPPQHPPTYNRRKMPL<br>VNRVI |

|             |                               |              |                         |              |                                                                                                                                                                                                                                                                                                                                               |
|-------------|-------------------------------|--------------|-------------------------|--------------|-----------------------------------------------------------------------------------------------------------------------------------------------------------------------------------------------------------------------------------------------------------------------------------------------------------------------------------------------|
| Nematode    | <i>Caenorhabditis elegans</i> | ENSEMBL v.91 | WBGene00003976          | <i>pes-1</i> | MTSSIKSDAPQFLDLDCSSLPPTPPKTASPGNSKMKGFNISDLCLDLDSSTSSSCSVSPASSFHTRSESVGQ<br>QQSGRNSPVSSSTESPTKRPKYSYNALIAMAIQSSPFKSLRVSEIYKYISSNFSYKNQKPLQWQNSVRHNL<br>HKEFRKVRTLDGKGSYWAMTADLGTDVYISNCGKLRQKSKVAKFPPMQQHFPQLPTQNIHQLCMQ<br>NPQILATLLQNMVLPQNLQNLQIPMVPGFPIIPVINPTSFFHPKSS                                                                    |
| Sea squirt  | <i>Ciona intestinalis</i>     | ENSEMBL v.91 | ENSCING00000018677      |              | MLHPTQQHGVTHRTLLPMQQYPYHPYPPPPYGASSGYEGFPHQRYQQQQPKVFPKPVYSYSLIAMSLR<br>NSKSGCLPVADIYSFMMENFPYFKTAPDGWKNVSRHNLNLKCFEKVGV                                                                                                                                                                                                                      |
| Lamprey     | <i>Petromyzon marinus</i>     | ENSEMBL v.91 | ENSPMAG00000004307      |              | CACPSVSQYPAMPYNGYASHQYSPHKIHTMQGRQQKVPKPIYSYSLIAMALKNSKNGSLPVSIDIYHF<br>MTENFPYFKTAPDGWKNVSRHNLNLKCFEKIENKASGSSRKGCLWTLNPAKVDKMDDEEMQKWKRKDP<br>VAIRRSMANP                                                                                                                                                                                    |
| Coelacanth  | <i>Latimeria chalumnae</i>    | ENSEMBL v.91 | ENSLACG00000017498      |              | MELVQVNTVVFASLHLQTCLODWDMDDEELNLTATTTDQYFQGGKEDEKIRLYGRTCARRMSSPFHSPWKKM<br>YTGLHKESNVQSNLWLMVDPNLACPIGYPKVEQSTSPVQPNPLSTATAAECPPQPSQVYPNTDDLDTDVS<br>SSISNFSDDCRKVEANPKRKNPANEDLKKNPAPKPLSKKMQCLLQSSGSRKGWPRPPINYCILIALALKNSKND<br>SLNVQQIYNFTNCREHFPFFQTAPDGWKNVSRHNLNLKCFNSFEKTSHFVSSGRNRKSLWRLTPEGRRKHEE<br>EAFPPQEVLAIIQRSMNEPKMMNVMFDL  |
| Spotted gar | <i>Lepisosteus oculatus</i>   | ENSEMBL v.91 | ENSLOC00000003199       |              | MYVQVQNRKFLDLHLATCLKDWDMSEIKLTTTTDQLCQDDKISSTWLCGSMWFSRCSRQTDFGSSRST<br>LSPHLKPLFEPSSLVLPNPNLACPIKYPSPKTPSPGASVGIQAPRPRTRCLPSSLSPPERAGHDDSPNSPS<br>SSSSSSDYLLTDEEDASSPDLPAQKPKAAKERGRRTGLAQSKRLRILQESCNLKSQCWPRPPVNYCILIAM<br>ALSSSRAGSLNVQQIYNFTREHFPFFQTAPDGWKNVSRHNLNLKCFNSFEKTPQLVCSQGRKRSCLWHLTADGR<br>RRLRNEIHLTGDSIAVLERSMTNPGMIRTLFEL |
| Spotted gar | <i>Lepisosteus oculatus</i>   | SIGENAE      | predicted in this study |              | MYVQVQNRKFLDLHLATCLKDWDMSEIKLTTTTDQLCQEPLEFEPSSLVLPNPNLACPIKYPSPKTPSP<br>GASVGIQAPRPRTRCLPSSLSPPERAGHDDSPNSPSSSSSSDYLLTDEEDASSPDLPAQKPKAAKERGR<br>TGLAQSKRLRILQESCNLKSQCWPRPPVNYCILIAMALSSSRAGSLNVQQIYNFTREHFPFFQTAPDGWKN<br>VSRHNLNLKCFNSFEKTPQLVCSQGRKRSCLWHLTADGRRRLRNEIHLTGDSIAVLERSMTNPGMIRTLFEL                                         |

|           |                              |              |                         |              |                                                                                                                                                                                                                                                                                                                                    |
|-----------|------------------------------|--------------|-------------------------|--------------|------------------------------------------------------------------------------------------------------------------------------------------------------------------------------------------------------------------------------------------------------------------------------------------------------------------------------------|
| Cod       | <i>Gadus morhua</i>          | ENSEMBL v.91 | ENSGMOG00000009491      |              | FFQDKKSLKMGGWPRPPVNYCILIAMALSSSHTGSLNVQQIYNFTREHFPPFQTAPDGWKNTIRHNLCSFSS<br>FCKTPYQLCREGKRKSLWHLTLDGRHRLGDEIRTLTGESFQQLKGSMSHP                                                                                                                                                                                                     |
| Cod       | <i>Gadus morhua</i>          | SIGENAE      | predicted in this study |              | MALQFQNSSRFFELHCSTGLTDWDMDEEMKLTITTTDQFFQDEKLNQYLAQWHYARISRRKKNKYVHDQK<br>SESFVKSNLWLMVNPNLACPIKYMKRSVHVPSVNVVPELKTPRHATERPDHSTLCTSSAAAPSCRARCAH<br>ASSSTTGFM LGDEEKAVLLDSPLYRKGPSRRKARIAKDKKSLKMGGWPRPPVNYCILIAMALSSSHTGSLNV<br>QQIYNFTREHFPPFQTAPDGWKNTIRHNLCSFSSFCKTPYQLCREGKRKSLWHLTLDGRHRLGDEIRTLTGE<br>SFQQLKGSMSHPDVIHTLFVL |
| Fugu      | <i>Takifugu rubripes</i>     | ENSEMBL v.91 | ENSTRUG00000014847      |              | MTLQLRTRKARLFDLHCSVGLTDWMDKELKLATTTDQIYHGDDKLEQYVVQRPAARASRRKDEFVWYDK<br>MSDTFVKPNLWLLVNPACPIQYGEEMSSDLQTAEPAGEIQTDPANRVPVQEVLLSSEYTVPMRPNNG<br>RFKSRRKGRMTAIDFKNLKPGCWPRPPVNYCILIALLKSSHTGSLKVVQIYQFTRENFPFQTAPDGWKN<br>TIRHNLCSFSSFRKTCNQMCRDGKRKSCFWHLTSDGQRRLLDEISTLPGETFKQLERSMSHPDVIRLLSL                                    |
| Medaka    | <i>Oryzias latipes</i>       | ENSEMBL v.91 | ENSORLG00000019674      |              | MTLELKTSARLLDLHCSVGLMDWDMHRELKLPITTTDQLLLDEKLDQHAERPSAGTLRKSDFVWNQKT<br>PDGFKPSLWLLVNPNLVCPVQYERGAAEAVRGVAEAAERLFTDQPSSAQRETKEAEFRRPAKSRRMGRTT<br>KVM DVSA LKPGCWPRPPVNYCILIALLKSSHTGCLKVQQIYNFTRENFPFQTAPDGWKNTIRHNLCSFSS<br>FRKTCNQLCRDGKRKSCFWHLTLDGHRRLKDEVHLLTGDTLKLQQRSMSPDPTVWSL                                            |
| Medaka    | <i>Oryzias latipes</i>       | NCBI         | NP_001153940.1          | <i>foxr1</i> | MTLELKTSARLLDLHCSVGLMDWDMHRELKLPITTTDQLLLDEKLDQHAERPSAGTLRKSDFVWNQKT<br>PDGFKPSLWLLVNPNLVCPVQYERGAAEAVRGVAEAAERLFTDQPSSAQRETKEAEFRRPAKSRRMGRTT<br>KVM DVSA LKPGCWPRPPVNYCILIALLKSSHTGCLKVQQIYNFTRENFPFQTAPDGWKNTIRHNLCSFSS<br>FRKTCNQLCRDGKRKSCFWHLTLDGHRRLKDEVHLLTGDTLKLQQRSMSPARPHESDPYVIDTLQTSFCV<br>EVGGNENINSNHGGRCC          |
| Platyfish | <i>Xiphophorus maculatus</i> | ENSEMBL v.91 | ENSXMAG00000018797      |              | QDLKSLKPGCWPRPPVNYCVLVALALKSSQTGSLKVVQIYNFTREHFPPFQTAPDGWKNTIRHNLCSFSSFR<br>KTCNQLCQCKEGRKSCFWHLTLDGHRRLQDELHLLTGETLKLKRSMSNP                                                                                                                                                                                                      |



|               |                               |              |                         |  |                                                                                                                                                                                                                                                                                                                                                                                           |
|---------------|-------------------------------|--------------|-------------------------|--|-------------------------------------------------------------------------------------------------------------------------------------------------------------------------------------------------------------------------------------------------------------------------------------------------------------------------------------------------------------------------------------------|
| Stickleback   | <i>Gasterosteus aculeatus</i> | ENSEMBL v.91 | ENSGACG00000017356      |  | SFQDSKTLKPGCWPRPPVNYCILIALLKSSHTGGLKVQYINFTREHFPPFQTAPDGGWKNTRHNLCSNSSF<br>RKTCNQLCRDGRKSCFWHLTLDGQRRLRDEIRALTGDSSRQLERSMSRP                                                                                                                                                                                                                                                              |
| Tetraodon     | <i>Tetraodon nigroviridis</i> | ENSEMBL v.91 | ENSTNIG00000018790      |  | MTLQLRTRARLLDLHCSVGLTDWMDKELRLATTTDQMPDRLSDQYVVQRPSARASRRKDEFVWYDK<br>MSDTFVKPNLWLLVNPACPIQYGETSSDLQTVSEPAAGGTRTDPAETRNPSPTEPRPPRFQEGLPGSEYVVP<br>PTHKSPRNRFCPLSVAFQDFKNLNPWCWPRRPVNYCILIALLRSSHSGSLKVQYIHFTRSRRTSPSYQTAPD<br>GWKNTRHNLCSNSSFRTKNQMCRDGKRKSCFWHLTPDGGQRRLMDEISTLPRETFRQLERSMSHPVIRNV<br>IFGF                                                                              |
| Tilapia       | <i>Oreochromis niloticus</i>  | ENSEMBL v.91 | ENSONIG00000006931      |  | MTLQLKTKAQLFNLHCSVGLTDWMDKELKLASTTDQLYHGDQYVVQRPSVRTSKRKALDTEYTRMQFCH<br>RTEIICMHLHPSLIVPVHSDGQTQQMPACQNFAPPLCFLMLLFFLSCLENEHPHDTFASDFFFFFFVKNDVVS<br>CQPVKSRRKARTIKPRVRTIALTWTSFLQQAFLDQTKPLKPGCWPRPPVNYCILIALLKSSHTGSLKVQYIN<br>FTREHFPPFQTAPDGGWKNTRHNLCSNSSFRTKNQLCRDGRKSCFWHLTLDGQRRLKDEIHMLTGESLK<br>QLEKSMSPVSDIIRSLFPM                                                            |
| Bowfin        | <i>Amia calva</i>             | SIGENAE      | predicted in this study |  | MFLQLQNRDSFLDLHQTCLNDWDMNEEIKLATTTDQFYQDEKRNQYLVQWHYARFSRRSSGKDDSPS<br>QSPSEMDEPQIQPSLWLVNPNLVCPIKYPQMTQVSPPAVTTWSPLTPSPALSPLPLEEPSLDESLLSGSS<br>SSEFMFTDDDDTSSVDVPVPRKPKTRKPKAPKERGRKPGPAQSRRLARVLQESGNLKNKGWPRPPVNYCI<br>LIAMALNSSRCGSLNVQYINFMREHFPPFQTAPDGGWKNTRHNLCSNSEKTPQLVSSQGRKKSCLWHL<br>TLDGRRRLRNEIHLTGDLSRLVLRSMAPDMISTLFEL                                                  |
| European eel  | <i>Anguilla anguilla</i>      | SIGENAE      | predicted in this study |  | MFLHLQNRSNFLDLHLKTCCLNDWDMNEEIKLTTTDDQFFQDEKRNQYLVQWHYARIARRTSSGKDDLSC<br>PSQESEEPQVQPNLWLMVNPTLACPIKYPKGSPTLTETSTIPEQHPPVMPVPAPTLPVPSAHPPSPVVERA<br>LDESIHDASSSEYLLTDEDDASSVDVPICRKKVSGGRKGSPPKDRVRKLNLAQNKRLQRVLQESNLLKSGA<br>WPRPPVNYCILIAMALNSSRTGSLNVQYINFTREHFPPFQTAPDGGWKNTRHNLCSNSSFRTKTPQQVSSEG<br>KRKSCWHLTVDGRRRLRNEIHLTGESFTVLRMSMNNPGTVL                                     |
| Butterflyfish | <i>Pantodon buchholzi</i>     | SIGENAE      | predicted in this study |  | MTRSWQRDAPRGFHKGHARLRHLWLCLELGAARTGDGKMFQVQNRSTFLDLHLTTALSDWDMSEEV<br>KLATTTDQYCHDEKCGDQYLAQWHYARNRRASGTEEGAGQQSEPQVQPNLWLMVNPNLACPIKYPDN<br>VLGARARVSPSPKLSPIGAPPGNVVTCTRPLSPTDRLTLDSPQLDASSSEYMLTDEDDASSVDVPICRKKVSC<br>WRARVPKERVRKGLAQSKRLQRVLQESNLLKNGGWPRPPVNYCILIAMALSSSHSGSLNVQYINFTREH<br>FPPFQTAPDGGWKNTRHNLCSNSSFKTPQQVPSSEGRKKSCLWHLTGDGQRRLRDEIQLTGESFRVLKRS<br>HDPDMIQTLFDL |

|            |                                 |              |                         |              |                                                                                                                                                                                                                                                                                                                                                       |
|------------|---------------------------------|--------------|-------------------------|--------------|-------------------------------------------------------------------------------------------------------------------------------------------------------------------------------------------------------------------------------------------------------------------------------------------------------------------------------------------------------|
| Sweetfish  | <i>Plecoglossus altivelis</i>   | SIGENAE      | predicted in this study |              | MSLQFQARRRFLHLSTGLNDWDMSEEINLTTTDDQFYQDNKWNQYIVQWHYARIARRKEDLLSQNTH<br>KSETQVHPNLWLMVNPNLACSEIYPKALKAPSRPKMQAQQTRPNPQSMGTPIQPRQIPQEISPIDIACLED<br>HHEVASSEYMMTDEDDASSVDVPIYRKAKSTRKGVPTKAGMRKLILAQNKRLQRLVQDSNNLKSQAWP<br>RPPVNYCILIAMALSSSHAGSLNVQIYNFTREHFPPFQTAPDQWKNKIRHNLCSFSSFRKTPQQVCSEGRK<br>SCLWHLTLDGHRRLRHEIHTLNVDSEFRVLRSMNDPDMIRTLFEL    |
| Allis shad | <i>Alosa alosa</i>              | SIGENAE      | predicted in this study |              | MFLRFGNIDRFDLHLTTGLTDWDINEEINLTTTDDQYHQDQQRNEYLIQWHYARMSRRTSTAEIPCQYSKQ<br>SDENDIEPNLWLVNPNLWCPMHPRLTPTKAYVGTGNIDHQFINHLPYEPLTPVSPEVLDKSPSDFFTSKR<br>MVSDDESSAGLEICRKMVKVTRQSRVPEKERACRTGQTRGRGRPRRRVHKDSDFAFRSWAWPRPPV<br>NYCLLIAMALGSCRTGSLNVQIYSFTREHFPPFQTAPDQWKNKIRHNLCSFSTSFKKTQQVSSGGGRKSC<br>WHLTSDGRMRHRSEIQMLSDDAIQLTRSMKYPDLIQELLDL        |
| Arowana    | <i>Osteoglossum bicirrhosum</i> | SIGENAE      | predicted in this study |              | MFLHIENRSSFLEHLKMLADWDMSEEVKFATTTDQFCQDGTQSEQGAARWDGAKLSKRDDDDKKEE<br>EARGEPEHGGSGSQVEPSLWLMVNPVACPIKYPKQAARDPTPAWPMHKGPPGVSSAVFSQSLIPHVPPS<br>PAEEAFPDASLHEASSSEYLATDEDSASPLDVQCCEAKWSRGLKPKKIRKLGMAQSKRLQRLVQESNYL<br>KNGEWPRPPVNYCILIAMALNSSHCGSLNVQIYNFTREHFPPFQTAPDQWKNKIRHNLCSFNSFKKTQQ<br>VSSEGRKKSCLWHLTLDGRRRLRDEIYTLGSEFRVLRSMNNPDLIQLTFLDL |
| Zebrafish  | <i>Danio rerio</i>              | ENSEMBL v.91 | ENSDARG0000004864       | <i>foxr1</i> | MFLQLQSKSKFLEHLTSLGLHDWDMNEEIKLTTTDDQFYHDEKRTDQYLAQWHYARISRRSSLPAAHRSLEL<br>PHRDPEIQPNLWLMVNPVSLACPIKYPKQAARDPTPAWPMHKGPPGVSSAVFSQSLIPHVPPS<br>LTDEDDASSVDVPICRKVKGTRKGRTPKANTRRLGLTQSRRLQALQDSMSLKSQVWPRPPVNYCILIAMAL<br>SSSRGSLNVQIYNFTREHFPPFLTAPDQWKNKIRHNLCSFNSFKKTQQVSGDGGRKKSCLWHLTLDGRQR<br>LRDEIHTLTEDSFRLRRSMNYPDMIPALLEL                   |
| Zebrafish  | <i>Danio rerio</i>              | NCBI         | NP_001096594.1          | <i>foxr1</i> | MFLQLQSKSKFLEHLTSLGLHDWDMNEEIKLTTTDDQFYHDEKRTDQYLAQWHYARISRRSSLPAAHRSLEL<br>PHRDPEIQPNLWLMVNPVSLACPIKYPKQAARDPTPAWPMHKGPPGVSSAVFSQSLIPHVPPS<br>LTDEDDASSVDVPICRKVKGTRKGRTPKANTRRLGLTQSRRLQALQDSMSLKSQVWPRPPVNYCILIAMAL<br>SSSRGSLNVQIYNFTREHFPPFLTAPDQWKNKIRHNLCSFNSFKKTQQVSGDGGRKKSCLWHLTLDGRQR<br>LRDEIHTLTEDSFRLRRSMNYPDMIPALLEL                   |

|               |                                |              |                         |                        |                                                                                                                                                                                                                                                                                                                                                                                                                                                                                                                                                                                                       |
|---------------|--------------------------------|--------------|-------------------------|------------------------|-------------------------------------------------------------------------------------------------------------------------------------------------------------------------------------------------------------------------------------------------------------------------------------------------------------------------------------------------------------------------------------------------------------------------------------------------------------------------------------------------------------------------------------------------------------------------------------------------------|
| Zebrafish     | <i>Danio rerio</i>             | ENSEMBL v.91 | ENSDARG00000011879      | <i>foxN1</i>           | MSSEPQGLSFLSISSSSSSPSPSAGQLQSFDSLESPCFQMPESQCHQSNNGGEGFVYPYSQRKSDPYSQKSAERF<br>RRHSVDGSPVGRDCDLTENSHYHPYRRQCSEGAISEGQPFSCVRRRAGLAREIASADGLEEQSSWTLTGDVE<br>TTSIMGTRRPYSEPEQESSEPPGYTTVNHQAYSAISPLQHQQYPSRGIDTVSHYNNQSLSTQTSQDSSPQPLY<br>PKPVYSYILIFLALRNSKTGSLPVSEIYSFMTEHFPYFKTAPDGWKNVSRHNLNLKCFEKENKNGNSSRKG<br>CLWALNPAKVEKMQEELHKWRRKDPLTVRRSMARPEELERLLGERPEKLSHFSLPSSHHSQPFVRNMHP<br>AYGHQPVENRILNQKALYNPLTSQNAVLPPIYSPDLAFQYSPATHQPSVGHPSRPTGSLDPLAHTP<br>PSYSTALQAGHSGTASMQELLLDGEINNDVDALNPSLTDLQLHGSLWEELRNDLAPDSLIVMDSASSLAQL<br>SPPPARDSAGVCAETEDGVQGSISELYLSSFYTTAFTSAENMPGLISSANTAIPLL |
| Zebrafish     | <i>Danio rerio</i>             | ENSEMBL v.91 | ENSDARG00000012833      | <i>foxN3</i>           | MGPVMPSPKPESSGVSVASGLSQFYQASSITRALQEAEMDLALPTIKLEKGSVEDEELTNLNLWHLHESKLL<br>NSFGDPVLRSPVQDLDDTTPSPAHSPLPYDAKQNPCKPPYFSCILFMAIEDAPSRLPVKDIYNWILE<br>HFPYFANAPTGWKNSVRHNLNLKCFKVKVDRSQSIGKGLWCIDPEYRQNLIALKKTYPYHPYSQVFTTP<br>PTSPQAYQSMSSPIWPGSPFYRKNKGVLLQVPQGVQIQNGARMMSQGLFPGIRPLPINPIVSRRTAAVRSVL<br>GYRITSDTEPTQNSPLATSDPKEDHTYSFAKSSGSDAEAAEQCDGSELNFHTNETGSDAEDDDKSKIKKEPKE<br>WSVDALALAQQHKKRQLLTKVKQRVASDTLPLKRRRTEKPPESDDEEMKEAAGSLHLLAGVRACLNNITNRTA<br>KGQKEQK                                                                                                                             |
| Cave fish     | <i>Astyanax mexicanus</i>      | ENSEMBL v.91 | ENSAMXG00000007405      | <i>Predicted foxr1</i> | LQARERFLSLHLSTGLHEWDMSEEIKLSTTTDQFHRDDKRNEQYLAQWHYARISRRTLGADSTHLAQPEDC<br>TESIIQPSLWLVNPNLACPIKYPTVKKSLKLTVDTPVPSPPVPVQNLHILPLDQTCLESNLDHSTLSSEY<br>QLTDDDTSSVDVPICRKVKGARKGRVPKEPSSRRLGLAQSRRLQRLVQDSCNLKNGAWPRPPVNYCILIAMA<br>LSSSRGSLNVQQIYNFTRDHFPFFITAPDGWKNTIRHNLCSFNSFKKTPQQVTGEGKRKSLWYLTLDGRRR<br>LRNEIHTLVDSFRMLKRSMNYPDMIQALFEL                                                                                                                                                                                                                                                           |
| Panga         | <i>Pangasius hypophthalmus</i> | SIGENAE      | predicted in this study |                        | MFLKLRASEKFLDLHLTTGLHDWDMNEEINLTTTDDQFSQDEMRNEQYLAQWHYARISRRTLPEELHQLSP<br>ANCEESVIQPNLWLMVNPCLACPIKYPVRDKKPSLPKLTIDRSASGPALAVPGQNLHLLPLSDEGLDES LHD<br>ASLSSEYQLTDDASSEDVAIRHKVKGTRRGRAPKEPSSHRLGLAQSRRLQRLVQDNRNLKSGAWPRPPVNY<br>CILIAMALSSSRGSLNVQQIYNFTREHFPFFLTAPEGWKNTIRHNLCSFNSFRKTPQQVTGDGKRKSLWHL<br>TLDGRRRLRNEIHTLADSFRMLKRSMNYPDMIQALFEL                                                                                                                                                                                                                                                  |
| Northern pike | <i>Esox lucius</i>             | NCBI         | XP_019904158.1          | <i>foxr1</i>           | MSLHFQTRSFRLEHLSTRLYDWDMEIEIKLTTTDDQFFQDDKRNDQYLQVQWHYARISRRKEDLSYQNRKKT<br>ESPVEPNLWLMVNPCLACPIKYPKVKTKILSPKTPLEHPAPVQPTVNHVKRMSAQNVFPASHIEGTCLEESL<br>HDASSSEYMLTDEDDTSSVDLPICRKLTARKAKASKREPRKLSLAHSLRQLQVLDQNNMMKNGAWPRPP<br>VNYCILIAMALSSSRGSLNVQQIYNFTREHFPFFQAPDGWKNTIRHNLCSFNSFRKTPQQVCSEGKRKSL<br>WHLTPDGRRRRLRDEIHTLTGDSYKVLKRSMNPNPEMIQTLFEL                                                                                                                                                                                                                                               |

|                    |                               |         |                         |              |                                                                                                                                                                                                                                                                                                                                                           |
|--------------------|-------------------------------|---------|-------------------------|--------------|-----------------------------------------------------------------------------------------------------------------------------------------------------------------------------------------------------------------------------------------------------------------------------------------------------------------------------------------------------------|
| Northern pike      | <i>Esox lucius</i>            | SIGENAE | predicted in this study |              | MSLHFQTRSFRLEHLSTRLYDWDMEIEIKLTTTTDQFYQDDKRNDQYLQVQWHYARISRRKEDLSYQNREKT<br>ESPVEPNLWLMVNPNLACPIKYPKVTVKILSPKTPLEHPAPVQPTVNHVKRMSAQNVFPASHIEGTCLLEESL<br>HDASSSEYMLTDEDDTSSVDLPICRKLKTARKAKASKREPRKLSLAHSLRQLQVLDQNNNMKNGAWPRPP<br>VNYCILIAMALSSSRTGSLNVQQIYNFTREHFPPFQTAPDQGWKNTIRHNLCSNSFRKTAQQVCSEGGKRKSC<br>WHLTPDGRRLRDEIHTLTGDSYKVLKRSMNNPEMIQTLFEL |
| Eastern mudminnow  | <i>Umbra pygmae</i>           | SIGENAE | predicted in this study |              | MSLHFRTSRFRLEHLSTRLYDWDMEIEIKLTTTTDQFYQDDKRNDQYLQVQWHYARISRRKDDLSCQNRVK<br>TESPIQPNLWLMVNPNLACPIKYPKVTVKILSPKIRLEHPEPVQPPDNHGKINSIANVLPALPFAESLPGAISS<br>SEYMQTDEETSSVDIPICRKKVTKTRKAKVPKYGPRKLSLAQSKRLQRIQLQDNKILKSGAWPRPPVNYCILIAMA<br>LSSCRSGSLNVQQIYKFTREHFPPFQTAPDQGWKNTIRHNLCSNSFRKTPQQVSSQGGKRKSCWHLTLDRGQ<br>RLRDEIHTLTGDSYRVLKRSMNNPDMIRALFDL    |
| American whitefish | <i>Coregonus clupeaformis</i> | SIGENAE | predicted in this study |              | MCLQFQTRSFRLEHLSTSLNDWDMDEIEIKLTTTTDQFYQGDKRNDQYLQVQWHYAKISRRKDDLSCQNYQ<br>KSESPMQPNLWLMVNPNLACPIKYPKVTVKILSPKMPKHLAPVPKPTVTHVKPSIPNVLPVSPTADTCLAD<br>SLHDASSSEYMLTDEDDSSVDVSVCRKAKTVHAKALKGGPRKLSLAQSKRLQRLQDSNNLKSAGAWLRPP<br>VNYCILIAMAIGSNRTGSLNVQQIYNFTREHFPPFQTAPDQGWKNTIRHNLCSNSFRKTPQQVCSEGGKRKSC<br>WHLTLEGRRLRDEIHTLTGDSYRVLKRSMNNPDMIQTLFEL    |
| Brook trout        | <i>Salvelinus fontinalis</i>  | SIGENAE | predicted in this study | <i>foxr1</i> | MSLQFQTRSFRLEHLSNSLNDWDMDEIEIKLTTTTDQFYQAEDKRNDQYLQVQYARISRRKDDLFSQNYQ<br>QKSDSPIQPNLWLMVNPNLACPIKYPKVTKAPVPKLTVTHVKPSIPNVLPVSPTEDTCLADSLHDASSEY<br>MLTDEDDASSLDVPICRKKVTARKAKAPKGGPRKLSLAQSKRLQRLQDSNNLKSAGAWLRPPVNYCILIAMA<br>IGSSRTGSLNVQQIYNFTREHFPPFQTAPDQGWKNTIRHNLCSNSFRKTPQQVCSEGGKRKSCWHLTLEGR<br>RLRDEIHTLTGDSYKVLKRSMNNPDMIQTLFAL              |
| Brook trout        | <i>Salvelinus fontinalis</i>  | SIGENAE | predicted in this study |              | MSLQFQTRSFRLEHLSNSLNDWDMDEIEIKLTTTTDQFYQEDKRNDQYLQVQYARISRRKDDLFSQNYQ<br>KSDSPIQPNLWLMVNPNLACPIKYPKVTKAPVPKLTVTHVKPSIPNVLPVSPTEDTCLADSLHDASSEYM<br>LTDEDDASSLDVPICRKKVTARKAKAPKGGPRKLSLAQSKRLQRLQDSNNLKSAGAWLRPPVNYCILIAMAIG<br>SSRTGSLNVQQIYNFTSFRKTPQQVCSEGGKRKSCWHLTLEGRRLRDEIHTLTGDSYKVLKRSMNNPDM<br>IQTLFAL                                          |
| Brown trout        | <i>Salmo trutta</i>           | SIGENAE | predicted in this study |              | MRMSLQFQTRSFRLEHLSNSLNDWDMDEIEIKLTTTTDQFYQGDQKNDQYLQVQYARISRRKDDLFSQ<br>NYQKSSDSPIQPNLWLMVNPNLACPIKYPKVTKILSPKVLKHLAPVPKPTVPHVKPSIPNVLPVSPTEDTC<br>LADSLHDVSCSEYMLTDEDDASSVDVPVCRKVTARNAKAPKGGPRKLSLAQSKRLQRLQDSNNLKSAGAW<br>LRPPVNYCVLIAMAIGSSRTGSFNQQIYNFTREHFPPFQTAPDQGWKNTIRHNLCSNSFRKTPQQVCSEGG<br>RKSCWHLTLEGRRLRDEIHTLTGDSYKVLKRSMNNPDMIQTLFAL     |

|                    |                             |         |                         |                             |                                                                                                                                                                                                                                                                                                                                                                 |
|--------------------|-----------------------------|---------|-------------------------|-----------------------------|-----------------------------------------------------------------------------------------------------------------------------------------------------------------------------------------------------------------------------------------------------------------------------------------------------------------------------------------------------------------|
| Rainbow trout      | <i>Oncorhynchus mykiss</i>  | NCBI    | XP_021479605.1          | <i>foxr1-like</i>           | MSLQFQTRSFRLEHLHLSNSLNDWDMDEEIKLTTTTDQFYQAGDKRNDQYLVQWQCARISRRKDDLSFQNY<br>QKSVEDSPIQPNLWLMVNPNLACPIKYPKKVTKILSPKVPLKHMVAPVKPTVTHVKPKSIPNVLPVSPPEDTC<br>LADSRHDVSSSEYMLTDEDDASSVDVPCRVKVTARKAKAPKGGPRKLSLAQSKRLQRLVQDSNNLKSQAW<br>LRPPVNYCILIAMAIGSSRTGSLNVQQIYNFTREHFFPQTAPDGWKNTRHNLCSNSFRKTPQQVCSEGKR<br>KSCLWHLTLEGRRLRDEIHTLTGDSYKVLKRSMMNPDMIQTLFAL       |
| Rainbow trout      | <i>Oncorhynchus mykiss</i>  | SIGENAE | predicted in this study |                             | MSLQFQTRSFRLEHLHLSNSLNDWDMDEEIKLTTTTDQFYQAGDKRNDQYLVQWQCARISRRKDDLSFQNYQ<br>KSVEDSPIQPNLWLMVNPNLACPIKYPKKVTKILSPKVPLKHLVVPKPTVTHVKPKSIPNVLPVSPPEDTCLA<br>DSRHDASSSEYMLTDEDDASSVDVPCRVKVTARKAKAPKGGPRKLSLAQSKRLQRLVQDSNNLKSQAWLR<br>PPVNYCILIAMAIGSSRTGSLNVQQIYNFTREHFFPQTAPDGWKNTRHNLCSNSFRKTPQQVCSEGKRKS<br>CLWHLTLEGRRLRDEIHTLTGDSYKVLKRSMMNPGEGGGTVVELHTEPLN |
| European whitefish | <i>Coregonus lavaretus</i>  | SIGENAE | predicted in this study |                             | MCLQFQTRSFRLEHLSTSLNDWDMDEEIKLTTTTDQFYQAGDKRNDQYLVQWHYAKISRRKDDLSQNYQ<br>KSESPMQPNLWLMVNPNLACPIKYPKVTIKILSPKMPLKHLAPVPTVTHVKPKSIPNVLPVSPADTCLAD<br>SLHDASSSEYMLTDEDDSSVDVPCRVKAKTAKALKGGPRKLSLAQSKRLQRLVQDSNNLKSQAWLRPP<br>VNYCILIAMAIGSNRTGSLNVQQIYNFTREHFFPQTAPDGWKNTRHNLCSNSFRKTPQQVCSEGKRKSC<br>LWHLTLEGRRLRDEIHTLTGDSYRVLKRSMMNPDMIQTLFEL                  |
| Coho salmon        | <i>Oncorhynchus kisutch</i> | NCBI    | XP_020340186.1          | <i>foxr1-like</i>           | MSLQFQTRSFRLEHLHLSNSLNDWDMDEEIKLTTTTDQFYQAGDKRNDQYLVQWQYARISRRKDDLPFQNY<br>QKSVEDSPIQPNLWLMVNPNLACPIKYPKKVTKLLSPKVPLKHLAPVVPKPTVTHVKPKSIPNVLPVSPEDTCL<br>ADSPHDASSSEYMLTDEDDTSSVDVPCRVKVTARKAKAPKGGPRKLSLAQSKRLQRLVQDSNNLKSQAWL<br>RPPVNYCILIAMAIGSSRTGSLNVQQIYNFTREHFFPQTAPDGWKNTRHNLCSNSFRKTPQQVCSEGKRK<br>SCLWHLTLEGRRLRDEIHTLTGDSYKVLKRSMMNPDMIQTLFAL       |
| Grayling           | <i>Thymallus thymallus</i>  | SIGENAE | predicted in this study |                             | MSLQFQTRSFRLEHLSTSLNDWDMDEEIKLTTTTDQFYQAGAKRNDQYLVQWHYARISRRKDDISQNYQK<br>SESPMQPNLWLMVNPNLACPIKYPKKVTKILSPKMPLKHLAPVPKSIPNVLPVSPEDTCLANSVHDASSSEY<br>MLTDEDDASSVDVPCRVKVTARKAKAAGGPRKLSLAQSKRLQRLVQDSNNLKSQAWLRPPVNYCILIAM<br>AISSRTGSLNVQQIYNFTREHFFPQTAPDGWKNTRHNLCSNSFRKTPQQVCSEGKRKSCWHLTLEGR<br>RRLRDEIHLPLTGDYSYRVLKRSMMNPDLIQTLFAL                      |
| Atlantic salmon    | <i>Salmo salar</i>          | NCBI    | XP_013992597.1          | <i>Predicted foxr1-like</i> | MRMSLQFQTRSFRLEHLHLSNSLNDWDMDEEIKLTTTTDQFYQAGDKQNDQYLVQWQYARISRRKDDLSFQ<br>NYQKSDSPIQPNLWLMVNPNLACPIKYPKKVTKILSPKVPLKHLAPVVKSTVPHVKPKSIPNVLPVSPEDICL<br>ADSLHDASSSECMLEDDASSVDVHVCRVKVTARNAKAPKGGPRKLSLAQSKRLQRLVQDSNNLKSQAW<br>LRPPVNYCVLIAMAIGSSRTGSLNVQQIYNFTREHFFPQTAPDGWKNTRHNLCSNSFRKTPQQVCSEGK<br>RKSCWHLTLEGRRLRDEIHTLTGDSYKVLKRSMMNPDMIQTLFAL          |

|                |                          |         |                         |                                                                                                                                                                                                                                                                                                                    |
|----------------|--------------------------|---------|-------------------------|--------------------------------------------------------------------------------------------------------------------------------------------------------------------------------------------------------------------------------------------------------------------------------------------------------------------|
| European perch | <i>Perca fluviatilis</i> | SIGENAE | predicted in this study | MTLQLKTKARLLDLHCSVGLTDWMDKELRLATTTDQFYHDDKLNQYVVQRPSARASRRKDEFIWKYD<br>SDFVKNLWLLVNPACPIQYGENTADLQTLCEPAEEIQTPLLPAETQRQLATELHMFDPHGAPLQEELL<br>HSTEYMNEDVSCRPAKNRRKGRNTKAKDNKILKPGCWPRPPVNYCILIALKSSHTGSLKVQQIYNFTREHF<br>PFFQTAPDGWKNTIRHNLFCNNSFRKTCNQVFRDGGKRKSCFWHLTLDGHRRLKDEIRTLTGESLKQLERSMS<br>RPDVIQSLFAL |
|----------------|--------------------------|---------|-------------------------|--------------------------------------------------------------------------------------------------------------------------------------------------------------------------------------------------------------------------------------------------------------------------------------------------------------------|
