# Supplementary material for: foxr1 is a novel maternal-effect gene in fish that is required for early embryonic success
Source: PubMed Central journal article supplement (PMC6109588; doi:10.7717/peerj.5534), 2018-08-23
Supplement: peerj-06-5534-s002.pdf [file peerj-06-5534-s002.pdf]

**Supplemental Data 2: Primers used in this study.**

| <b>Gene</b>                     | <b>Accession number</b> | <b>Product size (bp) [WT or mutant]</b> | <b>Primer sequence (5' – 3')</b> |
|---------------------------------|-------------------------|-----------------------------------------|----------------------------------|
| <i>foxr1</i> genotyping forward | ENSDARG00000004864      | 400 or 160                              | ATCCGCCATAACCTGTGCTT             |
| <i>foxr1</i> genotyping reverse |                         |                                         | GCAGGTTCAATTTCTCCAGCC            |
| <i>foxr1</i> qPCR forward       |                         | 57 or 0                                 | AGAAAGTCCTGTCTGTGGCA             |
| <i>foxr1</i> qPCR reverse       |                         |                                         | CTCGTCTCTCAGTCTCTGCC             |
| cloning <i>foxr1</i> forward    |                         | 729                                     | TTACCACGATGAGAAGCGGA             |
| cloning <i>foxr1</i> reverse    |                         |                                         | TGCCACAGACAGGACTTTCT             |
| <i>p21</i> forward              | ENSDARG00000076554      | 198                                     | GCCGCTGGAAAGGAAAACAT             |
| <i>p21</i> reverse              |                         |                                         | TGTGTGTGTGTGTGTCTCCT             |
| <i>p27</i> forward              | ENSDARG00000054271      | 139                                     | GGAATCACGACTGTAGGGT              |
| <i>p27</i> reverse              |                         |                                         | TTCGGGTCACCTCATCCACA             |
| <i>rictor</i> forward           | ENSDARG00000002020      | 197                                     | CCAGCTCTAGACACAACAGC             |
| <i>rictor</i> reverse           |                         |                                         | GGAGAGGGAGATCAGGAAGC             |
| <i>gfp</i>                      |                         | 152                                     | AGACGTTGTGGCTGTTGTAG             |
| <i>vasa</i>                     | AF461759.1              |                                         | TTAGACATGACCGGAAGAGTTG           |
| 18S rRNA forward                | KY486501.1              | 118                                     | CGGAGGTTCGAAGACGATCA             |
| 18S rRNA reverse                |                         |                                         | AAGACTCGTGGTTTCCCGCA             |
| $\beta$ - <i>actin</i> forward  | NM_181601.4             | 200                                     | CCGTGACATCAAGGAGAAGCT            |
| $\beta$ - <i>actin</i> reverse  |                         |                                         | TCGTGGATACCGCAAGATTCC            |
| <i>EF1</i> $\alpha$ forward     | NM_199949.2             | 160                                     | CTTCCTCCAAGCCCAGGACT             |
| <i>EF1</i> $\alpha$ reverse     |                         |                                         | TAACGTCATCAGCCTGAGAGG            |
