# Supplementary material for: foxr1 is a novel maternal-effect gene in fish that is required for early embryonic success
Source: PeerJ journal article supplement (doi:10.7717/peerj.5534), 2018-08-23
Supplement: supp_data_3.pdf [file supp_data_3.pdf]

|             | Zebrafish FoxR1 |            | FoxR1 : FoxR2 |            |
|-------------|-----------------|------------|---------------|------------|
|             | Positivity      | Similarity | Positivity    | Similarity |
| Human FoxR1 | 34%             | 50%        | 56%           | 72%        |
| Human FoxR2 | 32%             | 48%        |               |            |
| Mouse FoxR1 | 37%             | 53%        | 47%           | 62%        |
| Mouse FoxR2 | 33%             | 49%        |               |            |
| Rat FoxR1   | 34%             | 49%        | 45%           | 59%        |
| Rat FoxR2   | 32%             | 48%        |               |            |
| Pig FoxR1   | 34%             | 50%        | 66%           | 77%        |
| Pig FoxR2   | 35%             | 48%        |               |            |
| Horse FoxR1 | 39%             | 53%        | 55%           | 66%        |
| Horse FoxR2 | 29%             | 41%        |               |            |
| Cow FoxR1   | 35%             | 50%        | 60%           | 72%        |
| Cow FoxR2   | 33%             | 48%        |               |            |
| Panda FoxR1 | 33%             | 46%        | 60%           | 73%        |
| Panda FoxR2 | 34%             | 48%        |               |            |
