# Supplementary material for: foxr1 is a novel maternal-effect gene in fish that is required for early embryonic success
Source: PeerJ. 2018 Aug 23;6:e5534. doi: 10.7717/peerj.5534 (PMC6109588; doi:10.7717/peerj.5534)
Supplement: Supplemental Information 4 [file peerj-06-5534-s004.xlsx]

## Sheet: Fig.3A
bone	brain	gill	heart	intestine	kidney	liver	muscle	ovary
0.0989837	0.0115655	0.398333	0.134161	0.331475	0.502542	0.418692	0.55031	5.12511
0.096593	0.0140597	0.402049	0.133331	0.340982	0.526467	0.408664	0.543026	5.11101
0.177249	0.0602727	0.474533	0.13574	0.159366	0.132819	0.16106	0.171773	1.89329
0.173205	0.0650698	0.482049	0.133168	0.160059	0.132993	0.160607	0.170193	1.91326
0.0662439	0.0675259	0.13787	0.134523	0.139501	0.14552	0.170392	0.0857447	2.31834
0.062086	0.0620486	0.13504	0.13161	0.138875	0.128147	0.173009	0.0794665	2.32231
				0.166301		0.13548
				0.166693		0.134721

## Sheet: Fig.3B
gill	heart	intestine	kidney/head	liver	muscle	ovary	testis	UF eggs	embryo
14	18	0	14	0	92	924	66	692	12

## Sheet: Fig.4A
Control	foxR1
1.73508	0.234862
1.75076	0.241049
1.60225	1.54377
1.62025	1.53396
1.57641	1.3479
1.53401	1.36656
	0.254881
	0.248782
	0.277222
	0.275029
	1.11198
	1.10025
	0.930002
	0.941104
	2.01695
	2.00982

## Sheet: Fig.4B
Control	foxR1
81	74.6
14	64.6
99.1	60.8
99.5	0
95.2	0
77.76	1.6
90.1	8
99.1	46
99.8	1.4
95.2	23.4
	15
	37
	20
	23
	43
	41
	39
	27

## Sheet: Fig.6A
Control	foxR1
0.303336	7.99601
0.409934	8.32385
0.239725	3.66005
0.162671	4.11709
0.171897	2.34359
0.218059	2.53142

## Sheet: Fig.6B
Control	foxR1
1.66114	1.7358
1.49305	1.70091
1.42325	1.24947
1.38856	1.23704
1.54115	0.783281
1.4937	0.772077

## Sheet: Fig.6C
Control	foxR1
3.50549	0.648041
1.54256	0.733108
1.62301	1.25508
1.55636	1.32148
1.29009	0.514204
1.32768	0.583183
	0.745444
	0.778756
